# Supplementary material
Source: PubMed Central journal article supplement (PMC7526822)
Supplement: AAC.00155-20-s0001.pdf [file AAC.00155-20-s0001.pdf]

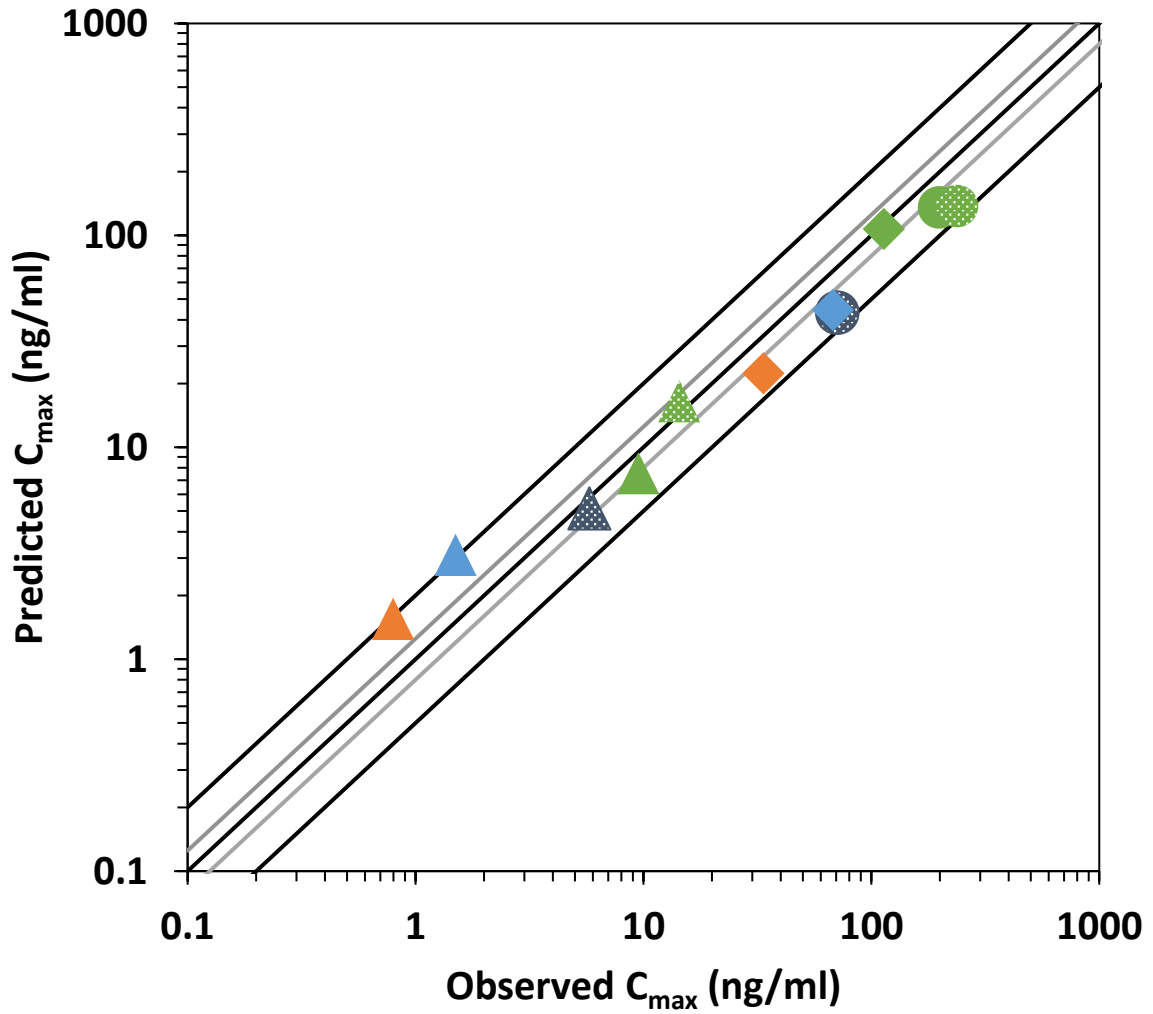

**Figure 1** Observed vs. simulated  $C_{max}$  plot of oral TAF at various doses. The orange markers indicate 5 mg, black - 8 mg, blue - 10 mg and green - 25 mg. The triangles indicate tenofovir, diamonds – TFV-DP and circles – TAF plasma  $C_{max}$ . Solid fill indicates single dose and dotted fill – multiple dose (day 8 or 10). The grey lines represent 0.8 and 1.25-fold range from the mean and the outer black lines represent 0.5 and 2-fold range

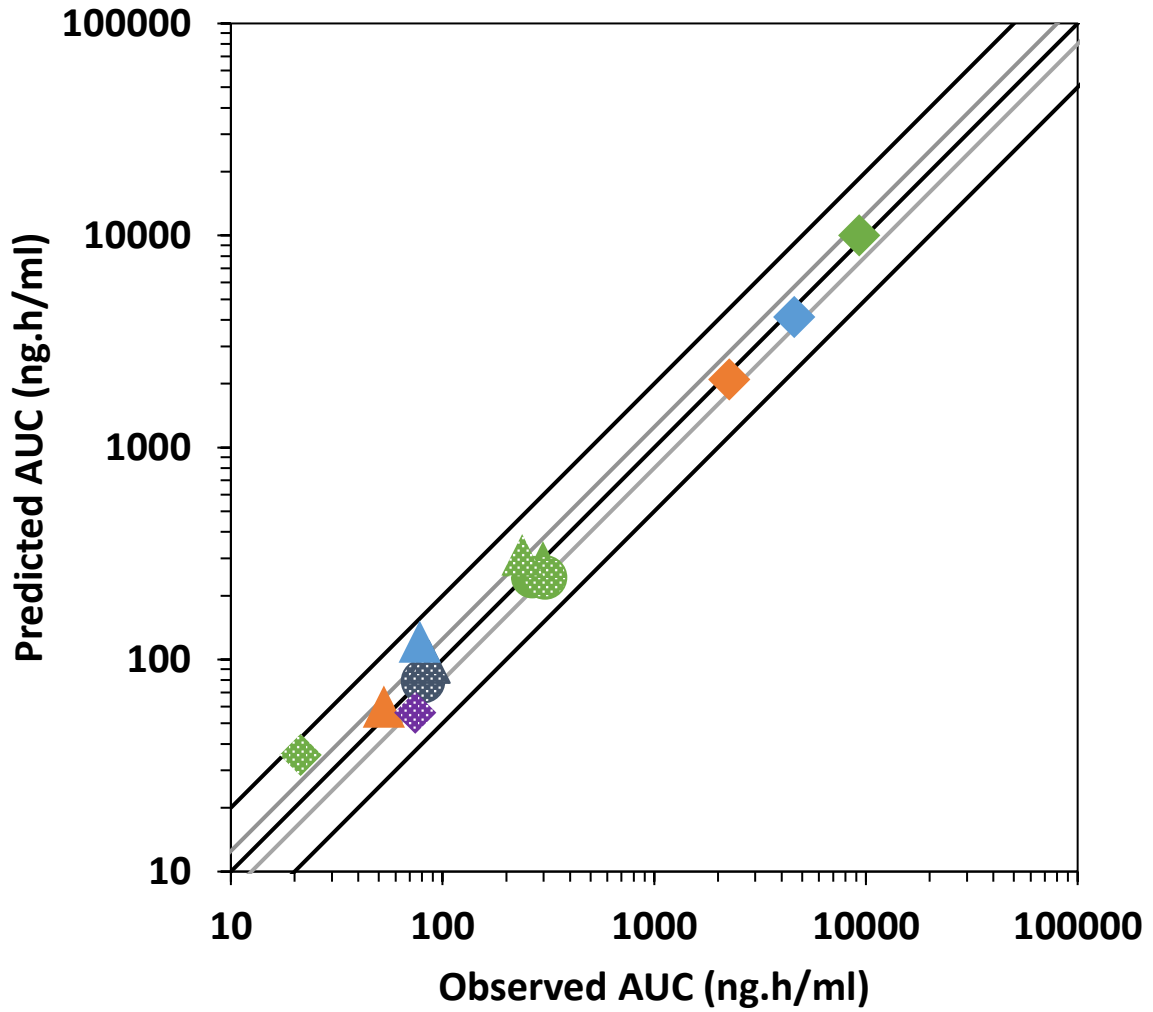

**Figure 2** Observed vs. simulated AUC plot of oral TAF at various doses. The orange markers indicate 5 mg, black - 8 mg, blue - 10 mg, green - 25 mg and violet – 40 mg. The triangles indicate tenofovir, diamonds – TFV-DP and circles – TAF plasma AUC. Solid fill indicates single dose and dotted fill – multiple dose (day 8 or 10). The grey lines represent 0.8 and 1.25-fold range from the mean and the outer black lines represent 0.5 and 2-fold range

**Table 1** PBPK qualification of TFV and TFV-DP at a single dose of 5 mg TAF [1]

| Study          | Clinical                   |                  | Simulated           |                  | % difference        |                  |        |
|----------------|----------------------------|------------------|---------------------|------------------|---------------------|------------------|--------|
|                | AUC <sub>last</sub>        | C <sub>max</sub> | AUC <sub>last</sub> | C <sub>max</sub> | AUC <sub>last</sub> | C <sub>max</sub> |        |
| TAF 5 mg day 1 | <sup>2</sup> TFV, plasma   | 52.8 (49.5-59.6) | 0.8 (0.6-1)         | 59.8 (31-120)    | 1.55 (0.6-2.99)     | 13.3%            | 93.8%  |
|                | <sup>2</sup> TFV-DP, PBMC* | 2268 (1519-4090) | 33.7 (26.4-50.6)    | 2092 (1303-3981) | 22.3 (14.2-42.6)    | -7.8%            | -33.8% |

AUC is AUC<sub>0-14 days</sub>. Values are represented as mean (CV). AUC is represented in ng.h/ml, C<sub>max</sub> in ng/ml. \*TFV-DP values are in fmol.h/10<sup>6</sup> cells, C<sub>max</sub> is in fmol/10<sup>6</sup> cells and are represented as median (range).

**Table 2** PBPK qualification of TAF and TFV on day 14 with once daily 8 mg TAF [2]

| Study           | Clinical                  |                  | Simulated            |                  | % difference         |                  |        |
|-----------------|---------------------------|------------------|----------------------|------------------|----------------------|------------------|--------|
|                 | AUC <sub>0-24h</sub>      | C <sub>max</sub> | AUC <sub>0-24h</sub> | C <sub>max</sub> | AUC <sub>0-24h</sub> | C <sub>max</sub> |        |
| TAF 8 mg day 14 | <sup>3</sup> TAF, plasma  | 81.2 (43.9)      | 71.0 (72.9)          | 78.7 (19.3)      | 43.0 (21.9)          | -3.1%            | -39.4% |
|                 | <sup>3</sup> TFV, plasma* | 86.1 (19.4)      | 5.8 (19.5)           | 97.6 (37.5)      | 5.14 (32.9)          | 13.4%            | -11.4% |

\*AUC is AUC<sub>0-24 h</sub> on day 14. Values are represented as mean (CV). AUC is represented in ng.h/ml, C<sub>max</sub> in ng/ml.

**Table 3** PBPK qualification of TFV and TFV-DP at a single dose of 10 mg TAF [1]

| Study           | Clinical                   |                  | Simulated           |                  | % difference        |                  |        |
|-----------------|----------------------------|------------------|---------------------|------------------|---------------------|------------------|--------|
|                 | AUC <sub>last</sub>        | C <sub>max</sub> | AUC <sub>last</sub> | C <sub>max</sub> | AUC <sub>last</sub> | C <sub>max</sub> |        |
| TAF 10 mg day 1 | <sup>2</sup> TFV, plasma   | 78.1 (68.2-86.9) | 1.5(1.4-1.7)        | 121 (61.5-239)   | 3.1 (1.8-5.9)       | 55.2%            | 106.7% |
|                 | <sup>2</sup> TFV-DP, PBMC* | 4584 (3113-5734) | 68 (56.9-88.8)      | 4121 (2598-7961) | 44.4 (29.8-85.2)    | -10.1%           | -34.7% |

AUC is AUC<sub>0-14 days</sub>. Values are represented as mean (CV). AUC is represented in ng.h/ml, C<sub>max</sub> in ng/ml. \*TFV-DP values are in fmol.h/10<sup>6</sup> cells, C<sub>max</sub> is in fmol/10<sup>6</sup> cells and are represented as median (range).

**Table 4** PBPK qualification of TFV and TFV-DP at single and multiple doses of 25 mg TAF [1-3]

| Study            | Clinical            |                      | Simulated             |                      | % difference          |                  |       |
|------------------|---------------------|----------------------|-----------------------|----------------------|-----------------------|------------------|-------|
|                  | AUC <sub>last</sub> | C <sub>max</sub>     | AUC <sub>last</sub>   | C <sub>max</sub>     | AUC <sub>last</sub>   | C <sub>max</sub> |       |
| TAF 25 mg day 1  | TAF, plasma [3]     | 266 (49.5)           | 199 (62.1)            | 244 (17.9)           | 135 (21.5)            | -8.3             | -32.2 |
|                  | TFV, plasma [3]     | 298 (26.1)           | 9.50 (36.5)           | 287 (36.6)           | 7.54 (30.1)           | -3.7             | -20.6 |
|                  | TFV-DP, PBMC* [1]   | 9306<br>(6891-10785) | 113.6<br>(80.9-150.2) | 9991<br>(6539-16590) | 107.0<br>(66.8-191.6) | 7.4              | -5.8  |
| TAF 25 mg day 14 | TAF, plasma [2]     | 306 (18.4)           | 238 (25.5)            | 243 (19.7)           | 137 (20.7)            | -20.6            | -42.4 |
|                  | TFV plasma [2]      | 238 (14.0)           | 14.4 (12.9)           | 310 (40.3)           | 16.5 (36.4)           | 30.3             | 14.6  |

Values are represented as mean (CV). AUC is represented in ng.h/ml, C<sub>max</sub> in ng/ml. \*AUC is AUC<sub>0-14 days</sub> and are in fmol.h/10<sup>6</sup> cells, C<sub>max</sub> is in fmol/10<sup>6</sup> cells. TFV-DP values are represented as median (range).

**Table 5** Computation of TFV-DP cervical and rectal tissue ratios for TAF [1]

**TAF single dose**

| <b>TFV-DP PBMCs</b>                 |                      | <b>5 mg</b> | <b>10 mg</b> | <b>25 mg</b> |                                                 | <b>5 mg</b> | <b>10 mg</b> | <b>25 mg</b> |
|-------------------------------------|----------------------|-------------|--------------|--------------|-------------------------------------------------|-------------|--------------|--------------|
| $C_{max}$                           | fmol/ $10^6$ cells   | 33.7        | 68           | 113.6        | fmol/g                                          | 1.11E+05    | 2.23E+05     | 3.73E+05     |
| $AUC_{0-24\text{ h}}$               | fmol.h/ $10^6$ cells | 657         | 1086         | 2094         | fmol.h/g                                        | 2.16E+06    | 3.56E+06     | 6.87E+06     |
| $AUC_{0-14\text{ days}}$            | fmol.h/ $10^6$ cells | 2268        | 4584         | 9306         | fmol.h/g                                        | 7.44E+06    | 1.50E+07     | 3.05E+07     |
| <b>TFV-DP female genital tissue</b> |                      |             |              |              | <b>TFV-DP female genital tissue/TFV-DP PBMC</b> |             |              |              |
| $C_{max}$                           | fmol/g               | BLQ         | 4499         | 9552         |                                                 |             | 0.020        | 0.026        |
| $AUC_{0-24\text{ h}}$               | fmol.h/g             | BLQ         | 63703        | 104086       | <b>Average – 0.031</b>                          |             | 0.018        | 0.015        |
| $AUC_{0-14\text{ days}}$            | fmol.h/g             | BLQ         | 986421       | 1309305      |                                                 |             | 0.066        | 0.043        |
| <b>TFV-DP rectal tissue</b>         |                      |             |              |              | <b>TFV-DP rectal tissue/TFV-DP PBMC</b>         |             |              |              |
| $C_{max}$                           | fmol/g               | BLQ         | 3456         | 11163        |                                                 |             | 0.015        | 0.030        |
| $AUC_{0-24\text{ h}}$               | fmol.h/g             | BLQ         | 45103        | 39162        | <b>Average – 0.02</b>                           |             | 0.013        | 0.006        |
| $AUC_{0-14\text{ days}}$            | fmol.h/g             | BLQ         | 315145       | 1041352      |                                                 |             | 0.021        | 0.034        |

### Unit conversion from fmol/10<sup>6</sup> cells to fmol/g

Volume of each PBMC = 282.9 fl [4]

Volume of each PBMC in litres =  $2.829 \times 10^{-13}$  L

Volume million PBMC in litres =  $2.829 \times 10^{-7}$  L

Volume million PBMC in ml =  $2.829 \times 10^{-4}$  mL

Density of PBMCs = 1.077 g/ml [5]

Weight of million PBMC in g =  $3.05 \times 10^{-4}$  g

## References

1. Cottrell, M.L., et al., *Single-dose pharmacokinetics of tenofovir alafenamide and its active metabolite in the mucosal tissues*. *Journal of Antimicrobial Chemotherapy*, 2017. **72**(6): p. 1731-1740.
2. Begley, R., et al., *Pharmacokinetics of Tenofovir Alafenamide When Coadministered With Other HIV Antiretrovirals*. *JAIDS Journal of Acquired Immune Deficiency Syndromes*, 2018. **78**(4): p. 465-472.
3. Custodio, J.M., et al., *Pharmacokinetics and Safety of Tenofovir Alafenamide in HIV-Uninfected Subjects with Severe Renal Impairment*. *Antimicrobial Agents and Chemotherapy*, 2016. **60**(9): p. 5135-5140.
4. Simiele, M., et al., *Evaluation of the Mean Corpuscular Volume of Peripheral Blood Mononuclear Cells of HIV Patients by a Coulter Counter To Determine Intracellular Drug Concentrations*. *Antimicrobial Agents and Chemotherapy*, 2011. **55**(6): p. 2976-2978.
5. Norouzi, N., H.C. Bhakta, and W.H. Grover, *Sorting cells by their density*. *PLOS ONE*, 2017. **12**(7): p. e0180520.
